# Supplementary material
Source: ML conference proceedings conference paper supplement (https://proceedings.neurips.cc/paper_files/paper/2019/hash/5df0385cba256a135be596dbe28fa7aa-Abstract.html)
Supplement: Supplementary file [file 5df0385cba256a135be596dbe28fa7aa-Supplemental.zip]

## 1 Supplementary material

**Proof of Proposition 1.** Let  $w = \sum_i w_i v_i / \bar{v}$ . Then it trivially satisfies  $\sum_i w_i v_i = \bar{v} w$ . Let  $w_{\min} = \min_i w_i$  and  $w_{\max} = \max_i w_i$ . We need to show that  $n w_{\min} \leq w \leq n w_{\max}$ . Note that  $w = \sum_i w_i v_i / \bar{v} \geq \sum_i w_{\min} v_i / \bar{v} = w_{\min} \sum_i v_i / \bar{v} = w_{\min} n \bar{v} / \bar{v} = n w_{\min}$ . Similarly, we can show that  $w = \sum_i w_i v_i / \bar{v} \leq n w_{\max}$ . The following proposition captures the relation between a layer of the concrete system and its left abstraction.

**Proof of Proposition 2.** Let  $(v_1, v_2) \in [[T]]_i$ . Let  $S_0$  and  $S_1$  be the left and right layers of  $\text{labs}(\mathcal{T}, j, P)$ , respectively. From the definition of the semantic of  $INN$  given by Definition 3, we know that for any  $s' \in S_1$ ,  $v_2(s') = \sigma(\sum_{s \in S_0} w_{s,s'} v_1(s) + b_{s'})$ , where for every  $s$ ,  $W_0^l(s, s') \leq w_{s,s'} \leq W_0^u(s, s')$ ,  $b_1^l(s') \leq b_{s'} \leq b_1^u(s')$ . We can group together all neurons that are merged together in  $P$ , and rewrite the above as  $v_2(s') = \sigma(\sum_{\hat{s} \in P} \sum_{s \in \hat{s}} w_{s,s'} v_1(s) + b_{s'})$ . From Proposition 1, we can replace  $\sum_{s \in \hat{s}} w_{s,s'} v_1(s)$  by  $v_{\hat{s}} w_{\hat{s}}$ , where  $v_{\hat{s}} = \sum_{s \in \hat{s}} v_1(s) / |\hat{s}|$  and  $w_{\hat{s}}$  is such that  $|\hat{s}| \min_{s \in \hat{s}} w_{s,s'} \leq w_{\hat{s}} \leq |\hat{s}| \max_{s \in \hat{s}} w_{s,s'}$ . Consider a valuation  $\hat{v}_1$ , where  $\hat{v}_1(\hat{s}) = v_{\hat{s}} = \sum_{s \in \hat{s}} v_1(s) / |\hat{s}|$ . Since, the average is in between the minimum and maximum values,  $\hat{v}_1 \in AV(v_1)$ . Now  $v_2$  can be rewritten using  $\hat{v}_1$  as  $v_2(s') = \sigma(\sum_{\hat{s} \in P} v_{\hat{s}} w_{\hat{s}} + b_{s'}) = \sigma(\sum_{\hat{s} \in P} \hat{v}_1(\hat{s}) w_{\hat{s}} + b_{s'})$ , where  $|\hat{s}| \min_{s \in \hat{s}} w_{s,s'} \leq w_{\hat{s}} \leq |\hat{s}| \max_{s \in \hat{s}} w_{s,s'}$ . Since  $w_{s,s'}$  also satisfies  $|\hat{s}| \min_{s \in \hat{s}} W_0^l(s, s') \leq w_{\hat{s}} \leq |\hat{s}| \max_{s \in \hat{s}} W_0^u(s, s')$ , we see that  $v_2 \in \text{Post}_{\text{labs}(\mathcal{T}, j, P)}(AV(v_1))$  (since,  $v_2$  and  $\hat{v}_1$  satisfy the semantics of  $\text{labs}(\mathcal{T}, j, P)$ ).

**Proof of Proposition 3.** Consider  $\hat{v}_2 \in AV(v_2)$ . Then  $\hat{v}_2(\hat{s}') = \alpha v_2(s'_1) + (1 - \alpha) v_2(s'_2)$ , where  $s'_1$  is the node in  $\hat{s}'$  for which  $v_2$  at the node is the minimum and  $s'_2$  is the node in  $\hat{s}'$  for which  $v_2$  at the node is the maximum. Let  $S_0$  and  $S_1$  be the nodes in the left and right layers of  $\mathcal{T}$ .  $v_2(s'_1) = \sigma(\sum_{s \in S_0} w_{s,s'_1} v_1(s) + b_{s'_1})$ , where for every  $s$ ,  $W_0^l(s, s'_1) \leq w_{s,s'_1} \leq W_0^u(s, s'_1)$ ,  $b_1^l(s'_1) \leq b_{s'_1} \leq b_1^u(s'_1)$ .  $\hat{v}_2(\hat{s}') = \alpha v_2(s'_1) + (1 - \alpha) v_2(s'_2) = \alpha \sigma(\sum_{s \in S_0} w_{s,s'_1} v_1(s) + b_{s'_1}) + (1 - \alpha) \sigma(\sum_{s \in S_0} w_{s,s'_2} v_1(s) + b_{s'_2})$ . Let us first consider the case where the expressions within  $\sigma$  are non-negative. Then  $\hat{v}_2(\hat{s}') = \alpha(\sum_{s \in S_0} w_{s,s'_1} v_1(s) + b_{s'_1}) + (1 - \alpha)(\sum_{s \in S_0} w_{s,s'_2} v_1(s) + b_{s'_2}) = \sum_{s \in S_0} (\alpha w_{s,s'_1} + (1 - \alpha) w_{s,s'_2}) v_1(s) + (\alpha b_{s'_1} + (1 - \alpha) b_{s'_2}) = \sum_{s \in S_0} w_{s,s'_1,s'_2} v_1(s) + b_{s'_1,s'_2}$ , where  $w_{s,s'_1,s'_2} = (\alpha w_{s,s'_1} + (1 - \alpha) w_{s,s'_2})$  and  $b_{s'_1,s'_2} = \alpha b_{s'_1} + (1 - \alpha) b_{s'_2}$ . Note that  $w_{s,s'_1,s'_2}$  and  $b_{s'_1,s'_2}$  are in the edge weights and biases of the abstract system. If  $\sum_{s \in S_0} w_{s,s'_2} v_1(s) + b_{s'_2}$  is negative, then  $v_2(s'_2) = v_2(s'_1) = 0$ , hence,  $\hat{v}_2(\hat{s}') = 0$  can be simulated using either the values used to obtain  $v_2(s'_1)$  or  $v_2(s'_2)$ . If  $v_2(s'_1) = 0$ , but  $v_2(s'_2) > 0$ , then we note that  $\sum_{s \in S_0} w_{s,s'_1} v_1(s) + b_{s'_1} \leq 0$  and  $(\sum_{s \in S_0} w_{s,s'_2} v_1(s) + b_{s'_2}) > 0$ , any linear combination of the two can still be obtained using  $v_1$ , and  $(1 - \alpha)(\sum_{s \in S_0} w_{s,s'_2} v_1(s) + b_{s'_2})$  is between the two values and can be obtained from  $v_1$ , and further, applying  $\sigma$  would give us  $v_2(s'_2)$ .

**Proof of Lemma 1.** Suppose  $(v, v') \in [[T]]_i$ . Then from Proposition 2, we have  $v' \in \text{Post}_{\text{labs}(\mathcal{T}, i, P_{i+1})}(AV(v))$ , and further, from Proposition 3, we have  $AV(v') \subseteq \text{Post}_{\text{labs}(\text{labs}(\mathcal{T}, i, P_{i+1}), P_i)}(AV(v))$ . Finally, from Lemma 2, we obtain that  $AV(v') \subseteq \text{Post}_{T/P, i}(AV(v))$ .

**Proof of Theorem 1.** Suppose  $(v, v') \in [[T]]$ , then there exists a sequence of valuations  $v_0, v_1, \dots, v_k$ , where  $v_0 = v'$  and  $v_i \in \text{Post}_{T, i}(v_{i-1})$  for  $i > 0$ . From Lemma 1, we know that since  $(v_i, v_{i+1}) \in [[T]]_i$ ,  $AV(v_{i+1}) \subseteq \text{Post}_{T/P, i}(AV(v_i))$ . Since,  $[[T]]$  is the composition of  $[[T]]_i$ , we obtain that  $AV(v_k) \subseteq \text{Post}_{T/P}(AV(v_0))$ . If the nodes in the input and output layer are not merged, then,  $AV(v_0) = \{v_0\} = \{v\}$  and  $AV(v_k) = \{v_k\} = \{v'\}$ . Therefore,  $(v, v') \in [[T]]$ .

**Proof of Theorem 2.** First, let us prove that if  $(v, v') \in [[T]]_i$ , then there is a valuation  $z \in \text{Val}(Q_i)$ , such that  $\text{Enc}(T, i)$  is satisfied with values  $v, v'$  and  $z$ . In fact, it suffices to fix an  $s'$  and show that  $C_{s'}^{i+1}$  is satisfied by  $v, v'(s')$  and  $z(q_{s'})$ . First, note that  $v'(s') \geq 0$  since it is obtained by applying the  $\text{ReLU}$  function, so the second constraint in  $C_{s'}^{i+1}$  is satisfied. From the semantics, we know that  $v'(s') = \sigma(\sum_{s \in S_i} w_{s,s'} v(s) + b_{s'})$ , where  $W_i^l(s, s') \leq w_{s,s'} \leq W_i^u(s, s')$  and  $b_i^l(s') \leq b_{s'} \leq b_i^u(s')$ . Hence,  $\sigma(\sum_{s \in S_i} W_i^l(s, s') v(s) + b_i^l(s')) \leq v'(s') \leq \sigma(\sum_{s \in S_i} W_i^u(s, s') v(s) + b_i^u(s'))$ . Let  $v''(s') = \sum_{s \in S_i} w_{s,s'} v(s) + b_{s'}$ , that is,  $v'(s') = \sigma(v''(s'))$ .

Case  $v''(s') \geq 0$ :  $v'(s') = v''(s')$  and we have  $\sum_{s \in S_i} W_i^l(s, s')v(s) + b_i^l(s') \leq v'(s') \leq \sum_{s \in S_i} W_i^u(s, s')v(s) + b_i^u(s')$ . Hence, for  $z(q_{s'}) = 0$ , the first, third and fourth constraints in  $C_{s'}^{i+1}$  are satisfied.

Case  $v''(s') < 0$ : In this case,  $v'(s') = 0$  and we set  $z(q_{s'}) = 1$ .  $\sum_{s \in S_i} W_i^l(s, s')v(s) + b_i^l(s') \leq \sum_{s \in S_i} w_{s,s'}v(s) + b_{s'} = v''(s') < 0 = v'(s')$ , so the first constraint is satisfied.  $\sum_{s \in S_i} W_i^u(s, s')v(s) + b_i^u(s') + Mq_{s'} = \sum_{s \in S_i} W_i^u(s, s')v(s) + b_i^u(s') + M$ . Since,  $M$  is an upperbound on the absolute value of  $x_{s'}$  before applying the *ReLU* operation,  $\sum_{s \in S_i} W_i^u(s, s')v(s) + b_i^u(s') + M$  is positive, and hence, satisfies the third constraint. The fourth constraint is satisfied by the choice of  $M$ , that is,  $M \geq x_{s'}$ .

Next, we prove the other direction. Suppose  $C_{s'}^{i+1}$  is satisfied for every  $s'$  by some  $v, v', z$ , then we show that  $(v, v') \in \llbracket T \rrbracket_i$ .

Case  $z(q_{s'}) = 0$ : In this case, we have  $\sum_{s \in S_i} W_i^l(s, s')x_s + b_i^l(s') \leq x_{s'} \leq \sum_{s \in S_i} W_i^u(s, s')x_s + b_i^u(s')$ . Since, *ReLU* is a monotonic function and  $x_{s'} > 0$  by the second constraint, we have  $\sigma(x_{s'}) = x_{s'}$  and hence,  $\sigma(\sum_{s \in S_i} W_i^l(s, s')x_s + b_i^l(s')) \leq x_{s'} \leq \sigma(\sum_{s \in S_i} W_i^u(s, s')x_s + b_i^u(s'))$ . Hence,  $x_{s'} = \sigma(\sum_{s \in S_i} w_{s,s'}x_s + b_{s'})$  for some  $W_i^l(s, s') \leq w_{s,s'} \leq W_i^u(s, s')$  and  $b_i^l(s') \leq b_{s'} \leq b_i^u(s')$ . Hence,  $v'(s')$  is obtained from  $v$  using the definition of  $\llbracket T \rrbracket_i$ .

Case  $z(q_{s'}) = 1$ : In this case,  $x_{s'} = 0$  and  $\sum_{s \in S_i} W_i^l(s, s')x_s + b_i^l(s') \leq x_{s'} = 0$ . Therefore  $\sigma(\sum_{s \in S_i} W_i^l(s, s')x_s + b_i^l(s')) = 0 = x_{s'}$ , therefore  $v'(s')$  is obtained from  $v$  using the definition of  $\llbracket T \rrbracket_i$ .
